# Supplementary material
Source: Research Square preprint supplement (doi:10.21203/rs.3.rs-9504631/v1)
Supplement: Supplementary file 1 [file 64aa37335171e6b9be533e9d.docx]

Appendix A: Pre-defined items used in the training week

| **Item label** | **Explanation** |
| --- | --- |
| Sleep | Slept poorly / had difficulty falling asleep |
| Eating | Ate irregularly or too little / too much |
| Substance use | Used alcohol, nicotine, or other substances in a way that caused problems |
| Overthinking | Ruminated or couldn’t stop thinking about problems |
| Screen time | Spent too much time on screens or social media |
| Somatic problems | Experienced physical discomfort or pain |
| Physical activity | Did not get enough physical activity |
| Negative memories / flashbacks | Was troubled by unpleasant memories or flashbacks |
| Emotion regulation | Had difficulty managing emotions |
| Concentration | Had trouble concentrating |
| Procrastination / avoidance | Avoided tasks or postponed things I needed to do |
| Social anxiety | Felt uncomfortable or anxious in social situations |
| Romantic life | Had problems in close or romantic relationships |
| Work / study | Had problems related to work or studies |
| Parenting | Had conflicts or difficulties related to parenting |
| Conflict handling | Had conflicts or handled conflicts poorly |
| Finances | Worried about money or financial problems |
| Other | Experienced another problem not listed above |

Appendix B - extra L-PECAN questions (not used in present analysis)

One part of the procedure, used only in the university-clinic sample, was later discontinued but is described here for completeness. For these patients, each individualized node was phrased as both a “pathogenic” and a “salutogenic” variant (for example, “slept poorly” vs. “slept well”; or “got stuck in negative thoughts” vs. “let go of negative thoughts”). As described above, participants indicated each day whether they experienced the pathogenic item, but this sample was also asked about the salutogenic version of the item. If the pathogenic variant was selected, participants reported perceived causes as described above. However, if the salutogenic variant was selected, they were similarly asked to report perceived causes for the salutogenic state (i.e., the other salutogenically phrased items). The intention was to capture perceived causal relations both when a problem was present and when it was absent, i.e., ensure that the edge was assessed each day. In practice, many item pairs ended up not being true opposites (for example, “sleeping well” is not necessarily the conceptual inverse of “sleeping poorly”): collapsing causes to the pathogenic and salutogenic variant of the same node might obscure interesting differences. Given this limitation, data from the salutogenic prompts are not analyzed further in the present paper.

Appendix C - Individualized items

*University clinic patients*

| **Patient 101** | **Patient 102** | **Patient 103** | **Patient 104** | **Patient 105** |
| --- | --- | --- | --- | --- |
| Stuck worrying | Stuck in thoughts | Stuck worrying | Ruminates | Stuck in thoughts |
| Physically inactive | Physically inactive | Physically inactive | Physically inactive | Physically inactive |
| Tired | Tired | Tired | Tired | Tired and in pain |
| High workload | Stuck with screentime | Work was meaningless | Overwhelmed at work | Work without taking a break |
| Stuck with screentime | Fell asleep late | Stuck with screentime | Isolates socially | Slept badly |
| Socially avoidant | Ate too little | Socially avoidant | Eats too little | Angry |
| Frequent awakenings | Avoided feelings | Bad work assignments | Obsessive thoughts | Procrastinates |
| Irregular meals | Alcohol | Conflicts with the kids | Compulsive behaviors | Unfocused |
| Over-involved with family |  | Negative emotions | Procrastinates | Overwhelmed by emotions |
| Unfocused |  |  |  |  |

*Specialist clinic patients*

| **Patient 106** | **Patient 107** | **Patient 108** |
| --- | --- | --- |
| Conflicts with husband | Flashbacks | Negative thoughts |
| Self-critical thoughts | Trouble falling asleep | Negative emotions |
| Anxiety | Compulsive behaviors | Need for control |
| Trouble sleeping | Anger | Financial troubles |
| Flashbacks | Negative thoughts | Restlessness |
| Tired / pain | Tired / pain | Physically inactive |
| Conflicts with son | Physically inactive |  |
| Physically inactive | Problems at work |  |
| Procrastinates | Negative emotions |  |
| Skips meals | Eats too little |  |

Online supplementals

See separate PDFs and animated GIFs, separated for all eight patients, all found at <https://osf.io/hma3e/overview?view_only=2fa0f1f341434be98dca8774bc930950>

1. Aggregated networks
2. Causal saturation plots
3. Centralities based on aggregated networks
4. Causal drift plots
5. Individual day-to-day networks as tables
